# Supplementary material for: Aflatoxin M1 Contamination in Dairy Milk in Kathmandu, Nepal
Source: Preprints.org preprint supplement (doi:10.20944/preprints202409.0591.v1), 2024-09-09
Supplement: Supplementary file 1 [file supplementary]

Table S1. Inclusion percentage of various ingredients in ‘homemade ready-made feed’ in dairy farms in Kathmandu district, Nepal.

| **Feedstuff** | **Inclusion % by farms** |
| --- | --- |
| Maize | 95% |
| Paddy husk | 95% |
| Mustard oil cake | 85% |
| Wheat bran | 72% |

Table S2. Inclusion percentage of different unusual feedstuffs in dairy farms in Kathmandu district, Nepal.

| **Unusual Feedstuff** | **Inclusion % as per by farms** |
| --- | --- |
| Left over grains | 39.6 |
| Leftover vegetables and fruits | 39.6 |
| Stale bread | 16.7 |
| Brewers dry yeast | 6.3 |
